# Supplementary material
Source: publisher site journal article supplement (https://www.dovepress.com/get_supplementary_file.php?f=421864.docx)
Supplement: Supplementary file 1 [file get_supplementary_file.php]

**Supplementary Table 1. Surgeon Preference of New Delivery System**

| **Question** | **n=6**  **n (%)** |
| --- | --- |
| How easy was it for you or your scrub nurse to prepare the Clareon AutonoMe before the implantation? |  |
| Very difficult | 0 |
| Difficult | 0 |
| Easy | 2 (33) |
| Very easy | 4 (67) |
| How easy was it for you to prepare the Clareon AutonoMe compared with your current delivery system? |  |
| More difficult | 0 |
| Same | 1 (17) |
| Easier | 4 (67) |
| Much easier | 1 (17) |
| How easy was the insertion of AutonoMe into the incision site? |  |
| Very difficult | 0 |
| Difficult | 0 |
| Easy | 3 (50) |
| Very easy | 3 (50) |
| How easy was the insertion of AutonoMe into the incision site compared with your current delivery system? |  |
| More difficult | 0 |
| Same | 3 (50) |
| Easier | 2 (33) |
| Much easier | 1 (17) |
| How controllable was the IOL during delivery? |  |
| Not controllable at all | 0 |
| Not very controllable | 0 |
| Controllable | 5 (83) |
| Very controllable | 1 (17) |
| How easy was the insertion of AutonoMe into the incision site compared with your current delivery system? |  |
| Less controllable | 0 |
| Same | 4 (67) |
| More controllable | 2 (33) |
| Much more controllable | 0 |
| Was your hand posture comfortable while delivery the IOL using AutonoMe? |  |
| Very uncomfortable | 0 |
| Somewhat uncomfortable | 0 |
| Comfortable | 3 (50) |
| Very comfortable | 3 (50) |
| Was your hand posture more comfortable using AutonoMe delivery system compared with your current delivery system? |  |
| Less comfortable | 0 |
| Same | 1 (17) |
| More comfortable | 5 (83) |
| Much more comfortable | 0 |
| Is AutonoMe more intuitive compared with a push or screw preloaded injector system? |  |
| Less intuitive | 0 |
| Same | 1 (17) |
| More intuitive | 4 (67) |
| Much more intuitive | 1 (17) |
| Is AutonoMe easier to use, overall, compared with your currently used delivery system? |  |
| More difficult | 0 |
| Same | 1 (67) |
| Easier | 5 (83) |
| Much easier | 0 |
| I prefer Clareon AutonoMe over my currently used IOL and delivery system. |  |
| Disagree | 0 |
| Neither agree nor Disagree | 1 (17) |
| Agree | 4 (67) |
| Strongly Agree | 1 (17) |
| Would you recommend this device to your colleagues? |  |
| Not recommend | 0 |
| Neither recommend nor not recommend | 1 (17) |
| Recommend | 4 (67) |
| Strongly recommend | 1 (17) |

Supplementary Table 2. Ocular Treatment-Emergent Adverse Events
(Safety Analysis Set)

| **AE, n (%)** | **All Eyes (n=126)** |
| --- | --- |
| Serious AEs |  |
| Cystoid macular edema | 1 (0.8) |
| Nonserious AEs | 11 (8.7) |
| Vitreous floaters | 2 (1.6) |
| Conjunctival hemorrhage | 1 (1.6) |
| Conjunctivitis allergic | 2 (1.6) |
| Corneal epithelium defect | 1 (0.8) |
| Diabetic retinopathy | 1 (0.8) |
| Dry eye* | 1 (0.8) |
| Glaucoma | 1 (0.8) |
| Intraocular pressure increased† | 1 (0.8) |
| Lacrimation increased | 1 (0.8) |
| Macular telangiectasia | 1 (0.8) |
| Pterygium | 1 (0.8) |
| Punctate keratitis | 1 (0.8) |

AE=adverse event.

Total counts for ocular AEs are based on the number of unique eyes with any event.

If an eye has multiple occurrences of an AE, the eye is presented only once.

*Newly reported clinical findings of dry eye compared with preoperative examination.

†Elevation of IOP by ≥10 mmHg above baseline to a minimum of 25 mmHg.
